# Supplementary material for: NADH oxidase-dependent CD39 expression by CD8+ T cells modulates interferon gamma responses via generation of adenosine
Source: Nat Commun. 2015 Nov 9;6:8819. doi: 10.1038/ncomms9819 (PMC4667632; doi:10.1038/ncomms9819)
Supplement: Supplementary Information — Supplementary Figures 1-13 and Supplementary Tables 1-2 [file ncomms9819-s1.pdf]

## Supplementary Figures and Legends

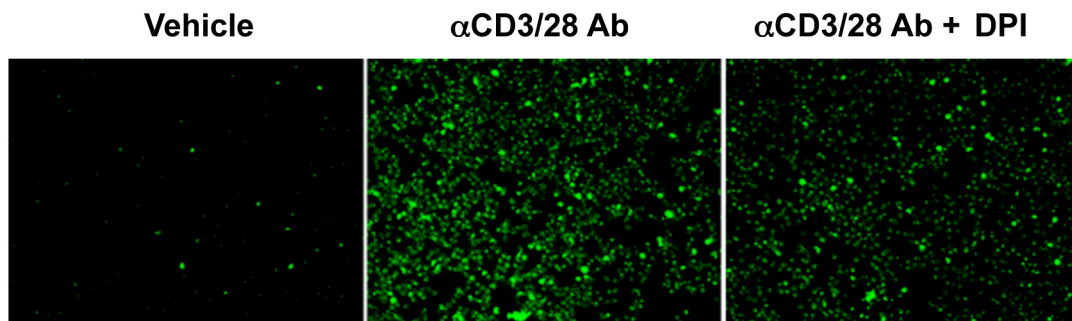

**Supplementary Figure 1.** NOX inhibition effectively blocks ROS generation. Healthy blood CD8<sup>+</sup> T cells were stimulated with anti-CD3/CD28 antibodies in the presence or absence of DPI (10  $\mu$ M) for 1 hr, ROS induction was determined by microscopy (X 200 magnification).

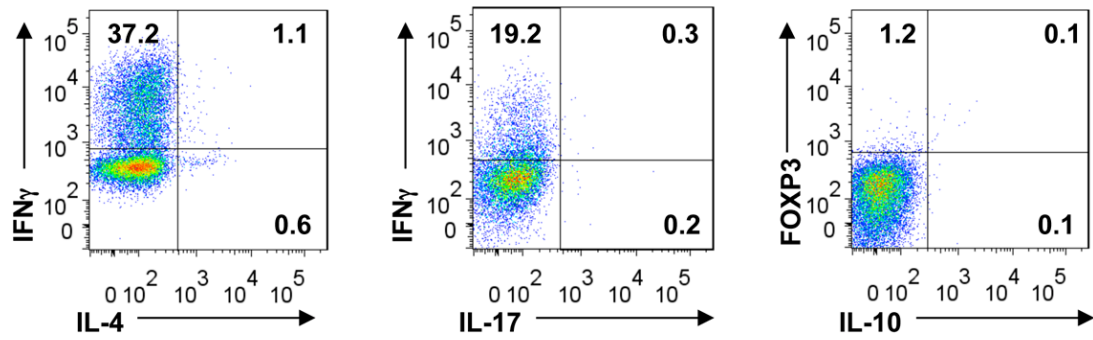

**Supplementary Figure 2.** Healthy blood CD8<sup>+</sup> T cells preferentially express IFN $\gamma$ . Blood CD8<sup>+</sup> T cells were stimulated with anti CD3/28 antibodies for 24hrs, and intracellular staining of IFN $\gamma$ , IL-4, IL-17, IL-10, or FOXP3, was analyzed by FACS. Data are representative of 3-4 independent experiments.

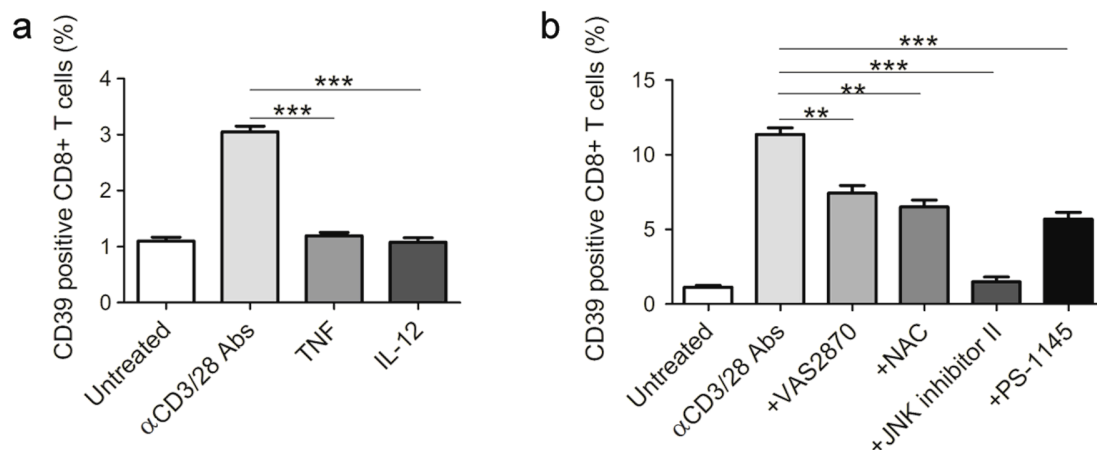

**Supplementary Figure 3.** Summary of FACS analyses of CD39 positive CD8<sup>+</sup> T cells. (a) Blood CD8<sup>+</sup> T cells were treated with anti-CD3 (10 µg/ml, precoated) and anti-CD28 (5 µg/ml, soluble) antibodies, or/and various reagents, as shown in Figure 2. CD39 expression was determined by flow cytometry at 24 hr (a) (n=4), or at 72 hr (b) (n=3). Data are presented as means ± S.E.M., \*\**P*<0.01, \*\*\**P*<0.001 (one-way ANOVA), with comparisons between groups.

TTGAACCTGGGAGGCAGAGGTTGCACTGAGCCAAGATCACGCCACTGCACT -1951  
 -1950 CCAGCCTGGATGACAGAGTGAGGCTCTGTCTCAAAAAAAGAAATGAAGAACGTAGTAAAAATAGGCCAGGCATGGTGGCTCACGCCTGTAATCCAGCACTTTGGGAGGCTGAGGCGGGCGGATCACTTGAGGTCAGAGTTCGAGACCA -1801  
 -1800 GCTGACCAACATGGTGAACCCCATCTCTACTAAAAATACACAAATAGCTGGCAGGTGGCGGGCGCTTAATCCAGCTACTTGGAGGCAGGCAGGAGAATCACTTGAACCCGGAGGCAGAGGTGCAGTAAGCTGAGATGG -1651  
 -1650 CTCATTGCACCTCCAGCTGGGAGACAAGAGTAAACTCTTGCTCAAAAAAAGAAACCTAATCTTAATGAATAAGTAGAGACCGTGCCACAGCACCCCAAGGTGTCTCTCATGACAAGCTCAGGTAC -1501  
 -1500 TTGTTTGTCTGTTTCTCCTGCCTACCCCTCAGCCACTCTGGATCTTCCCCTTGATCATTCTTTCTCTTTCTAGCTTTGATGTTTGGTTTCCATTCTGTAATTCGCACACTATTTTGTGGACATGCTCTTTTCAAATTTCTCTCAAAA -1351  
 -1350 CAATAGTACAAAGGCACTCAAAACCAATTGTTGGTTTTTACAAAAATCCCATCATATCACAAAAACAGTCTTTATCATAACAGGATGAATATCAGACCAATATTATTATTAGAGATGTAGTCTAAACTGACTCTGGAGAAGACATC -1201  
 -1200 CATTGAGTCTTTTATTAGTGTAAATAGTTGTTATCATATGCAAAATCCTATAACTATAAGCATTTTCAAGAAATAAGTATTGTTAAACAGCTCCAAATTTATTAAAGTATAAAAAATGTTATTGAGTATATACCATGTGGCACCGTGC -1051  
 -1050 AAAGTAACAGAGATGCCTAACTAAAGGTTATCCTTTGCTCTTATTAAAGTATGACTGAAGCTCGTGGAGATATAGTTTCTACATAGAGTCAAAACAGTCTTCGGGCTCACAAATTTAATGATTTTATATGTTATACTGGCTTTA -901  
 -900 GATACAAATTTACATGCCAGACAAGCAATGTAGAAAAATCAAGAAGTAGGAAACAGGAAACAGATCTACATTTCTGCTTGTGCAATTCATTCAATTTTTTCAACATTTCATCAAAATTTTATTAGAGGCCATGCTGTGAGAGAAAC -751  
 -750 TGTATTAGGTGCTGGGGAACATGGTAGCAAAATAGAGAGACCATGTATGTAGCATGAGCAGGTGGCTTAACCTCTCCACATCTCTAACCTCTTTTAGACTCAATGTCTGAGGTATCTTTCAGACCTGAAATGCTAAGGTTTGCAACAGC -601  
 -600 CTTGTGGAGGAGAGCTGCCAAGTCGCCTTGGGACTTGAGGACTTACCTTCCTTTCAAAGGATTAGCCCTTGTTTGTGTTTCAAAATAATTTGTTTACACAGTTTAAAAATAATTTGGTCAAGGCTCTCATCTACATTGGGGTAACTCTG -451  
 -450 ACGGTCTGGATGTGTAATTCATGCTCATTAGACTTCAAGGTAGCAAGTCAAGTTGGGAAATGGTGGATGACTTTCATCAATTCATAGCCAGGCAGCGGTTCCATTGAGCAGCTCCTCTGTGGTTCCACCCAGCCTTCCAACCAATA -301  
 -300 ACGCAGCTCTCTCGAGGAACTCATCGCTTGGGTCACTGTTGCTCTTGTCTTAATGAGCCTTGAGAAAGGATTGCTGGTCAAGGACCAAGAGGCTTTATGGGAGGGAAGAACTGTTCTTGACTTTTTCAGAGCGGTTTC -151  
 -150 AAGTAACAACCTTTCTTATTATCTAGCTTCATAATTGCAGTAAGGAATAGCTTTTTTGTGCTTGACGTGAGATGACTTTTCAAGGGAGAAAAGGGATTCTATAACGAAGAGAGGGAGAGAGATGAAGAGGGAGGGAGTAAGGGAG -1

**Supplementary Figure 4.** Putative sixteen JNK/c-Jun binding sites (c-Jun1 to c-Jun16, in red) and one of the NFkB p65-binding sites (NFkB, in blue) within the CD39 promoter region.

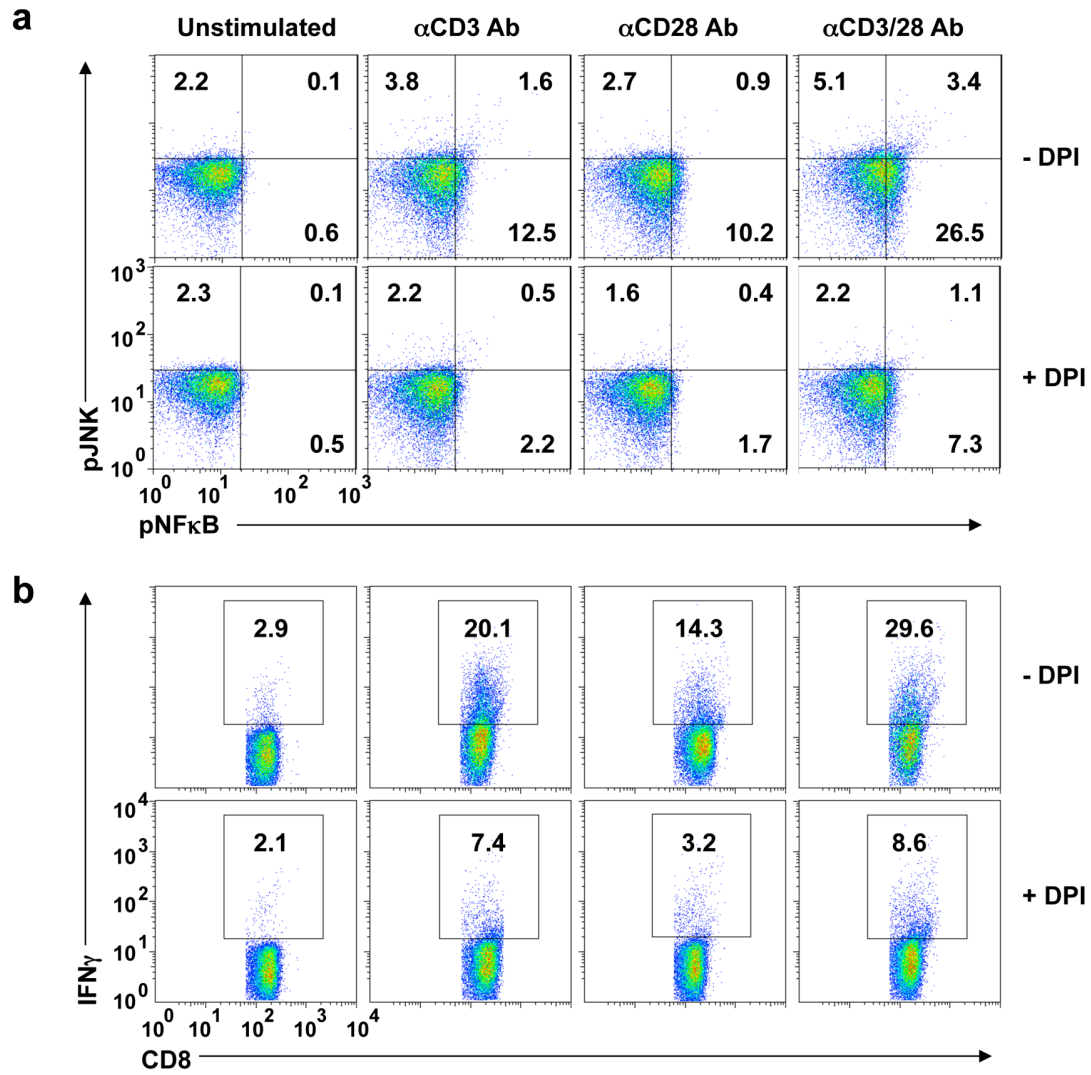

**Supplementary Figure 5.** Synergy between CD3 and CD28 signaling in Tc1 development. (a,b)

Healthy blood CD8<sup>+</sup> T cells were stimulated with anti CD3 (10  $\mu$ g/ml) or/and CD28 (5  $\mu$ g/ml) antibodies in the presence of vehicle or DPI (10  $\mu$ M), and intracellular staining of p-JNK and p-NF $\kappa$ B p65 was analyzed by at 60 min (a), or intracellular IFN $\gamma$  expression was examined at 24 hr (b) by FACS. Data are representative of 3 independent experiments.

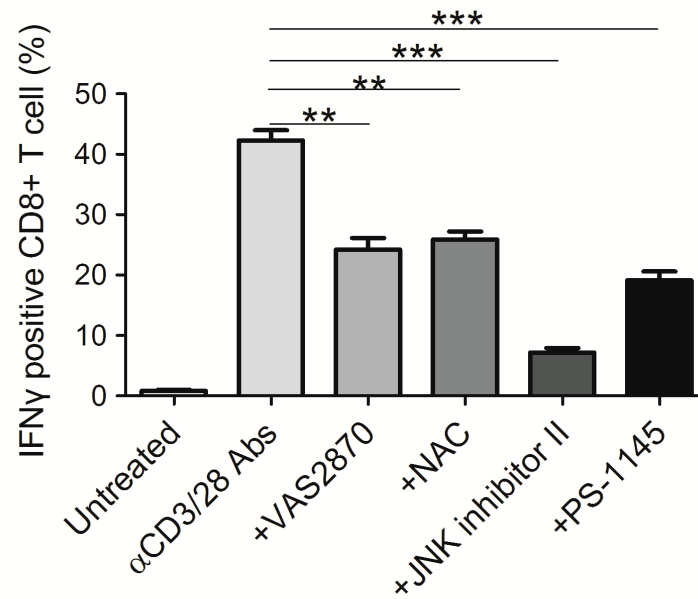

**Supplementary Figure 6.** Representative flow cytometry of IFN $\gamma$  positive CD8 $^{+}$  T cells. Blood CD8 $^{+}$  T cells were stimulated with anti-CD3 (10  $\mu$ g/ml, precoated) and anti-CD28 (5  $\mu$ g/ml, soluble) antibodies, in the presence or absence of VAS2870 (10  $\mu$ M), NAC (10 mM), JNK inhibitor II (10  $\mu$ M), and PS-1145 (10  $\mu$ M) for 24 hr (n=3). Data are presented as means  $\pm$  S.E.M., \*\* $P$ <0.01, \*\*\* $P$ <0.001 (one-way ANOVA), with comparisons between groups.

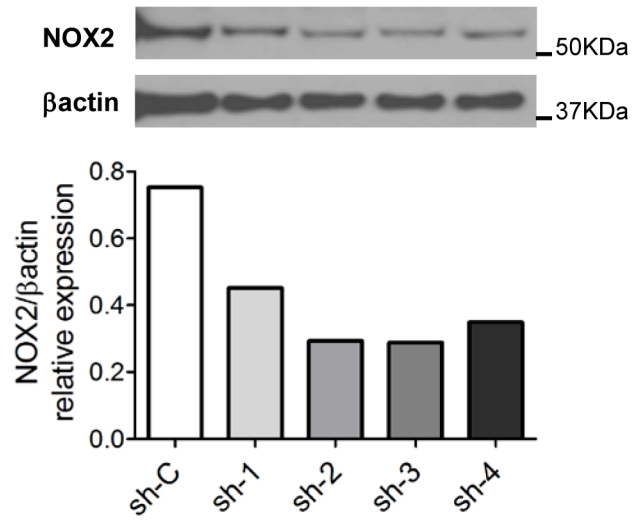

**Supplementary Figure 7.** Knockdown of NOX2 in CD8<sup>+</sup> T cells. Western blot analyses of NOX2 expression in healthy blood CD8<sup>+</sup> T cells after knock down using four lentiviral shRNAs (sh-1, 2, 3, and 4) and empty shRNA vector control (sh-C).

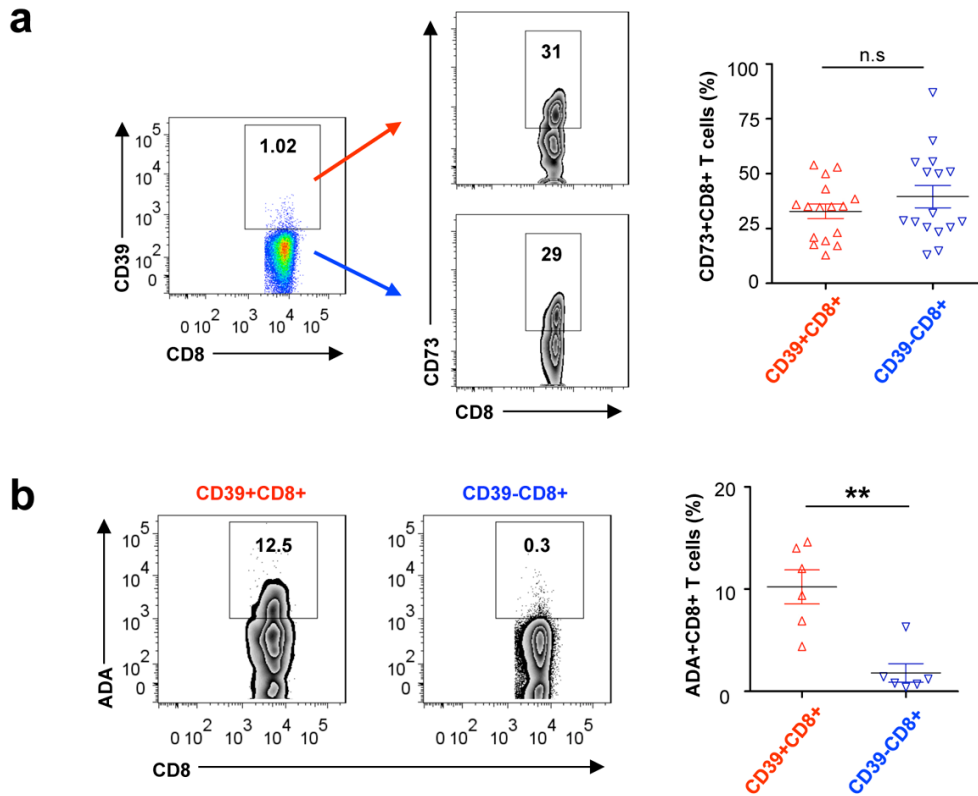

**Supplementary Figure 8.** Expression of CD73 and ADA in blood CD8<sup>+</sup> T cells. **(a,b)** Representative flow cytometric analyses of CD73 **(a)** and ADA **(b)** expression on blood CD39<sup>+</sup> and CD39<sup>-</sup> CD8<sup>+</sup> T cells. Statistical analyses of percentages of specific CD8<sup>+</sup> T cell subsets are shown on the right in each panel. Data are presented as means  $\pm$  S.E.M., n.s.= non-significant. **\*\*** $P < 0.001$  (Student's t-test).

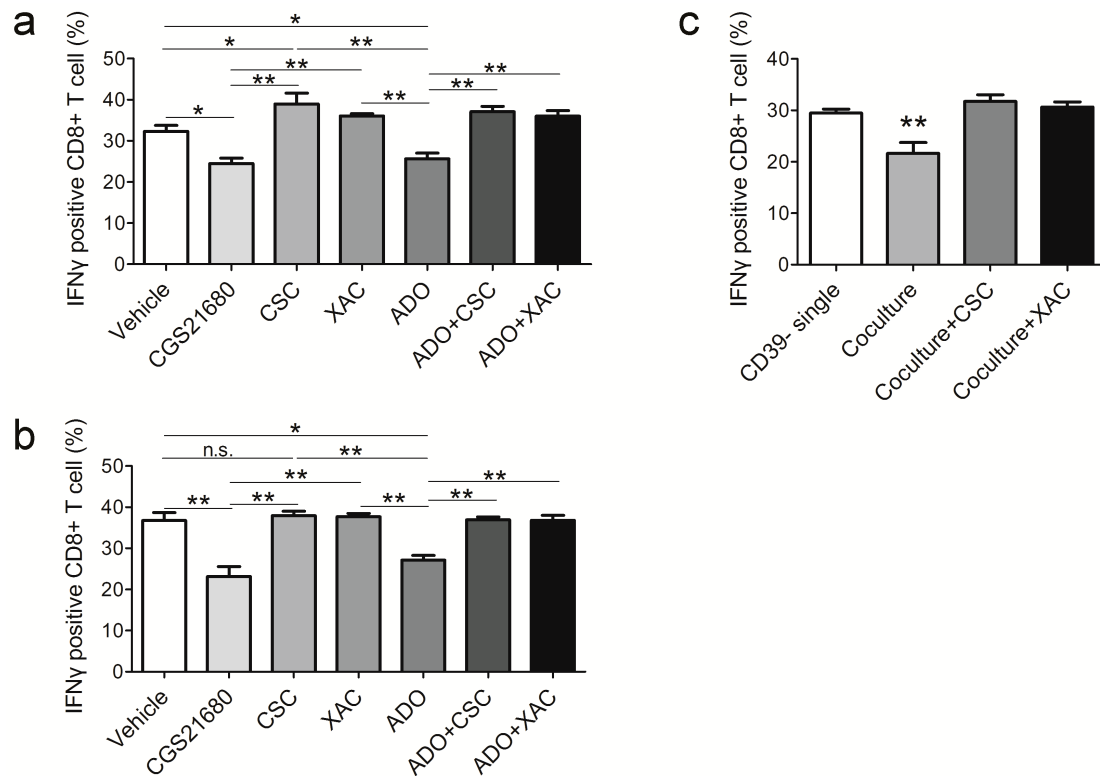

**Supplementary Figure 9.** Purinergic signaling modulates IFN $\gamma$  expression by CD8 $^{+}$  T cells. **(a,b)**

Total CD8 $^{+}$  T cells **(a)** or freshly sorted CD39 $^{-}$ CD8 $^{+}$  T cells **(b)** were stimulated with anti-CD3/CD28 antibodies in the presence of vehicle or CGS21680 (100 nM), adenosine (ADO, 50  $\mu$ M) alone or together with CSC (500 nM) or XAC (1  $\mu$ M) for 24 hr, IFN $\gamma$  expression was analyzed by FACS (n=3). Data are presented as mean  $\pm$  S.E.M., n.s.= non-significant, \* $P$ <0.05, \*\* $P$ <0.01 (one-way ANOVA), with comparisons between groups. **(c)** CD39 $^{-}$ CD8 $^{+}$  T cells (CFSE-labeled) alone or co-cultured with CD4 $^{+}$ CD39 $^{+}$ CD161 $^{+}$  T cells were stimulated with anti-CD3/CD28 antibodies for 24 hr followed by FACS analysis of IFN $\gamma$  expression. Co-cultures were incubated in the presence of vehicle, CSC (500 nM), or XAC (1  $\mu$ M) (n=3). Data are presented as means  $\pm$  S.E.M., \*\* $P$ <0.01 (one-way ANOVA), in comparison with the other groups.

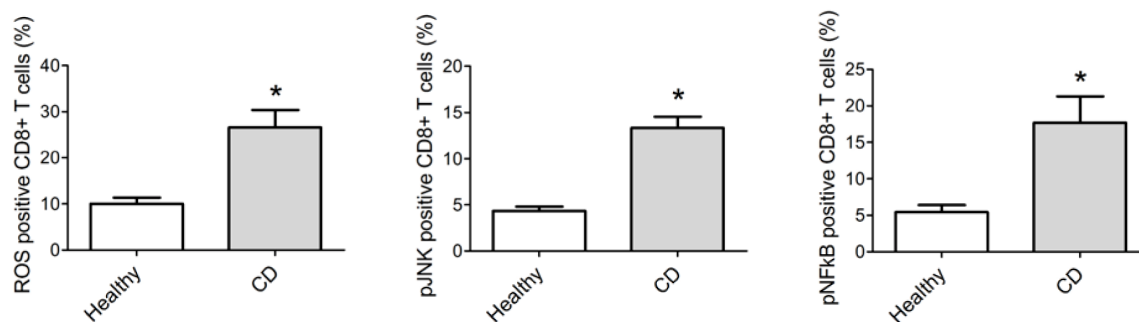

**Supplementary Figure 10.** Summary of FACS analyses of ROS induction (n = 4 and 7, for healthy and CD, respectively), intracellular pJNK (n = 4, 6) and pNFkB (n = 4, 6) levels in lamina propria CD8<sup>+</sup> T cells of healthy donors and active Crohn's disease (CD) patients. Data are presented as mean  $\pm$  S.E.M., \* $P$ <0.05 (Student's t-test).

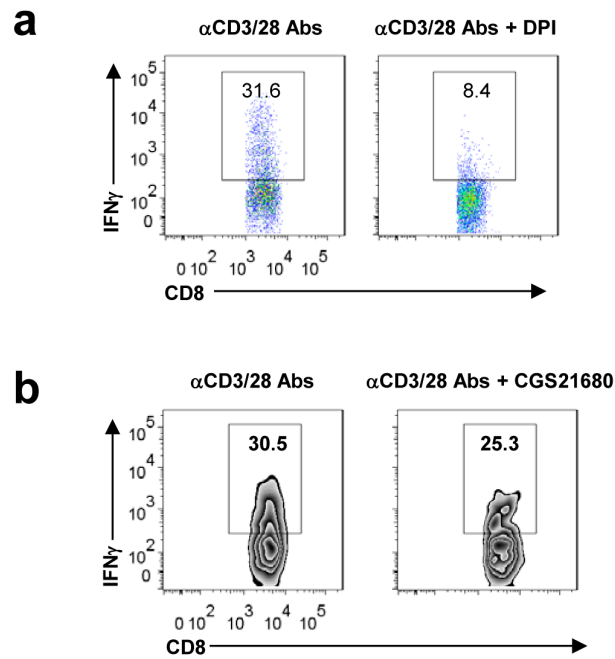

**Supplementary Figure 11.** Reactive oxygen species (ROS) and A2A signaling modulates Tc1 responses in lamina propria of Crohn's disease (CD). **(a,b)** Lamina propria CD8<sup>+</sup> T cells isolated from patients with active CD were stimulated with anti-CD3/CD28 antibodies in the presence of vehicle, DPI (10  $\mu$ M) **(a)**, or CGS21680 (100 nM) **(b)**, respectively, for 24hr, followed by determination of intracellular IFN $\gamma$  levels by FACS. Data are representative of 7 **(a)** or 3 **(b)** independent experiments.

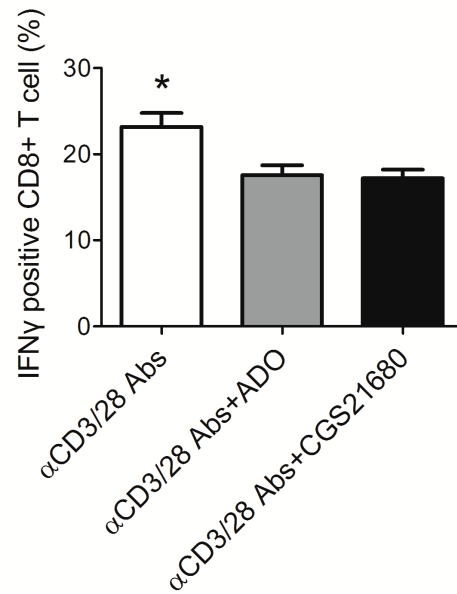

**Supplementary Figure 12.** A2A receptor agonists decrease IFN $\gamma$  production of blood CD8<sup>+</sup> T cells from Crohn's disease (CD). Peripheral blood CD8<sup>+</sup> T cells of active CD patients were stimulated with anti-CD3/CD28 antibodies in the presence of adenosine (ADO, 50  $\mu$ M), or CGS21680 (100 nM), followed by analyses of IFN $\gamma$  expression at 24hr by FACS (n=3). Data are presented as mean  $\pm$  S.E.M., \* $P$ <0.05 (one-way ANOVA), in comparison with other groups.

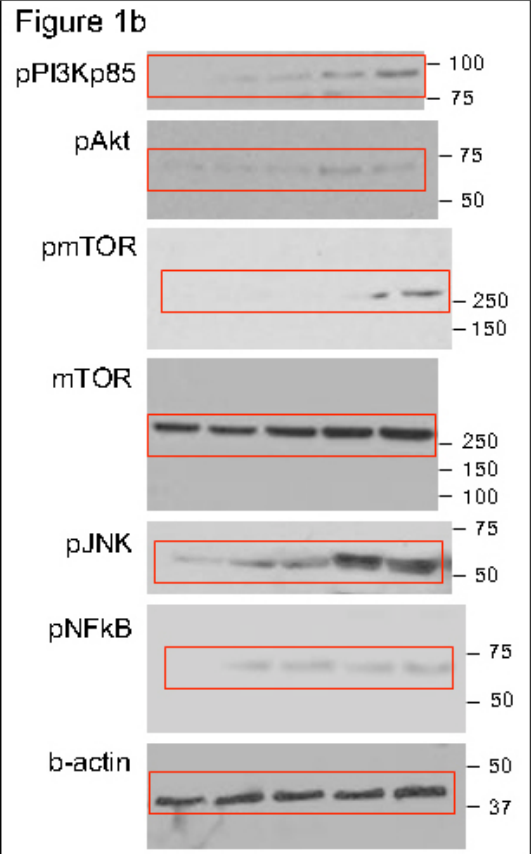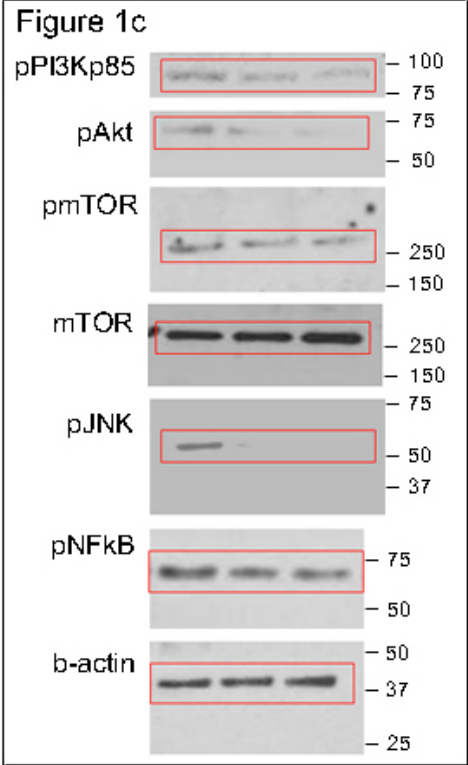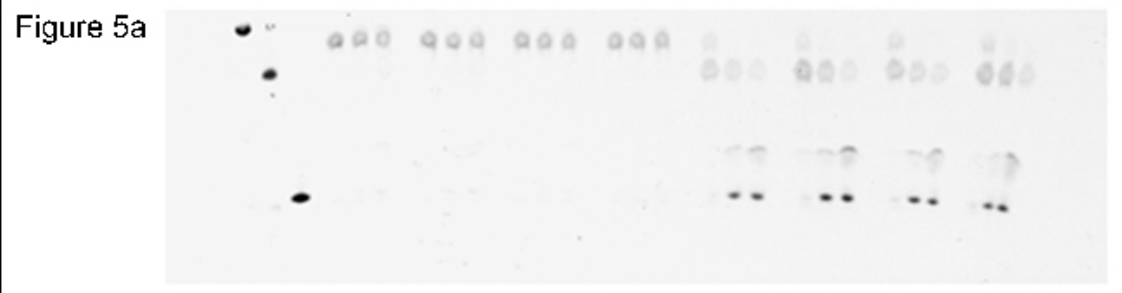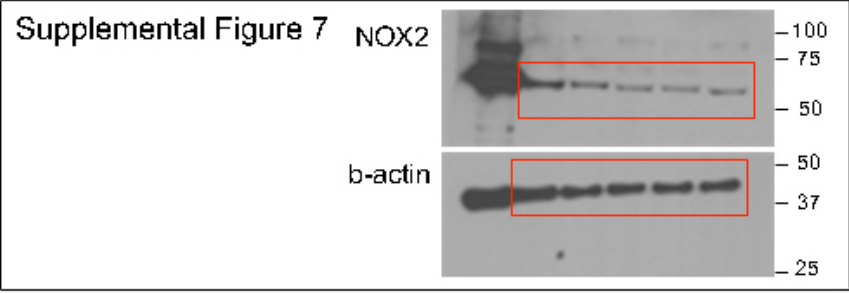

**Supplementary Figure 13.** The full blots of western shown and TLC in Figure 1b and c, Figure 5a, and Supplemental Figure 7.

**Supplementary Table 1.** Details the ten primer sets (from JNK1 to JNK10) used in the study.

| Transcripts | Primer sequences                          | Positions     |
|-------------|-------------------------------------------|---------------|
| JNK1        | Forward 5'- GGCAGAGGTTGCAGTGA -3'         | -1989 — -1854 |
|             | Reverse 5'- CTGGGATTACAGGCGTGAG -3'       |               |
| JNK2        | Forward 5'- CACTTTGGGAGGCTGAGG -3'        | -1853 — -1707 |
|             | Reverse 5'- CCTCCAAGTAGCTGGGATTAC -3'     |               |
| JNK3        | Forward 5'- CCATTCTGTAATTCGCACACTATTT -3' | -1409 — -1248 |
|             | Reverse 5'- TGGTCTGATATTCATCCTGTTATGA -3' |               |
| JNK4        | Forward 5'- TCATAACAGGATGAATATCAGACCA -3' | -1273 — -1180 |
|             | Reverse 5'- CACTGAATGAAAGACTCAATGGATG -3' |               |
| JNK5        | Forward 5'- ACCGTGCAAAGTAACAGAGAT -3'     | -1057 — -871  |
|             | Reverse 5'- CATTGCTTGTCTGGCATGTAAA -3'    |               |
| JNK6        | Forward 5'- ACTTGAGGACTTACCTTCCTTTC -3'   | -566 — -417   |
|             | Reverse 5'- GTCTAATGAGCATGAATTACCACAT -3' |               |
| JNK7        | Forward 5'- TCATGCTCATTAGACTTCAAAGGTA -3' | -431 — -328   |
|             | Reverse 5'- CAGAGGAGCTGCTCAATGG -3'       |               |
| JNK8        | Forward 5'- GGTTCCACCCAGCCTTC -3'         | -326 — -239   |
|             | Reverse 5'- CTCATTAGAGCAAAGAGCAACAG -3'   |               |
| JNK9        | Forward 5'- CCTGTTGCTCTTTGCTCTAATG -3'    | -362 — -135   |
|             | Reverse 5'- AGAAAGTTGTTACCTTGAAACCC -3'   |               |
| JNK10       | Forward 5'- CGGGTTTCAAGGTAACAACCTTTC -3'  | -157 — -25    |
|             | Reverse 5'- CTCTCTCTCCCTCTCTTCGTTAT -3'   |               |

**Supplementary Table 2.** qRT-PCR primers. This listing shows the primer sequences used in the study.

| Transcript | Primer sequence                         |
|------------|-----------------------------------------|
| NOX1       | Forward 5'- TGAGAGGACAGAGGCAAATAAC -3'  |
|            | Reverse 5'- GAGATGGAAGAGAAAGGGAGATG -3' |
| NOX2       | Forward 5'- GCTATGAGGTGGTGATGTTAGT -3'  |
|            | Reverse 5'- CTCAGATTGGTGGCGTTATTG -3'   |
| NOX 3      | Forward 5'- CTGAAGCTGAGCAAGGTGTAT -3'   |
|            | Reverse 5'- CGTGTTTCCAGGGAGAGTAAG -3'   |
| NOX4       | Forward 5'- GCAGCAAGATACCGAGATGAG -3'   |
|            | Reverse 5'- GAGGCTGTGATCATGAGGAATAG -3' |
| NOX5       | Forward 5'- GGTCTGCTTCATCGCATTAGTA -3'  |
|            | Reverse 5'- CTCTCTGTTGAGCAGGATTAGG -3'  |
